# Supplementary material for: Adiponectin Trajectories Before Type 2 Diabetes Diagnosis: Whitehall II study
Source: PubMed Central journal article supplement — Diabetes Care. 2012 Nov 14;35(12):2540–7. doi: 10.2337/dc11-2263 (PMC3507593; doi:10.2337/dc11-2263), 2012-11-14
Supplement: supp_dc11-2263v112263_DC112263SupplementaryData.pdf [file supp_dc11-2263v112263_DC112263SupplementaryData.pdf]

SUPPLEMENTARY DATA

**Supplementary Table1.** Fixed effects for multilevel models of change over time of log<sub>2</sub>(adiponectin) concentrations before diabetes diagnosis or end of follow-up among white participants.

|                                     | <b>Model 1</b>  | <b>Model 2</b> | <b>Model 3</b> | <b>Model 4</b>         | <b>Model 5</b> |
|-------------------------------------|-----------------|----------------|----------------|------------------------|----------------|
| <b>Incident diabetes</b>            | -0.24(0.05)*    | -              | -              | -                      | -              |
| <b>Early-onset diabetes</b>         | -               | -0.45(0.13)†   | -0.36(0.12)‡   | NS                     | NS             |
| <b>Late-onset diabetes</b>          | -               | -0.26(0.05)*   | -0.23(0.05)*   | -0.10(0.05)<br>p=0.051 | -0.10(0.05)§   |
| <b>Female</b>                       | 0.79(0.03)*     | -              | 0.79(0.03)*    | 0.80(0.03)*            | 0.61(0.03)*    |
| <b>Diabetes x Female</b>            | -0.20(0.10)§    | -              | -0.19(0.10)§   | -0.22(0.10)§           | -0.21(0.10)§   |
| <b>Time (per year)</b>              | -0.005(0.001)*  | -0.004(0.001)* | -0.005(0.002)* | NS                     | 0.005(0.001)*  |
| <b>Female x Time</b>                | NS              | -              | NS             | NS                     | 0.006(0.002) ‡ |
| <b>Diabetes x Time</b>              | NS              | NS             | NS             | NS                     | NS             |
| <b>Early-onset diabetes x Time</b>  | -               | -0.029(0.012)§ | -0.026(0.012)§ | NS                     | NS             |
| <b>Diabetes x Female x Time</b>     | -0.018 (0.006)‡ | -              | -0.018(0.005)† | -0.018(0.005)‡         | -0.011(0.003)‡ |
| <b>BMI (per 1 kg/m<sup>2</sup>)</b> | -               | -              | -              | -0.049(0.003)*         | -              |
| <b>Waist (per cm)</b>               | -               | -              | -              | -                      | -0.016(0.000)* |

Data are regression coefficients (SE). All models were adjusted for age at the end of follow-up. Model 1 is also adjusted for sex, model 2 for early-onset diabetes (<52 years of age at diabetes diagnosis), model 3 for both sex and early-onset diabetes, model 4 is as model 3 but further adjusted for BMI, model 5 is model 3 with additional adjustment for waist circumference. Trajectories are for 270 white incident diabetes cases and 2299 white controls. Models with the lowest information criteria are shown. \* P<0.0001, † P<0.001, ‡ P<0.01, § P<0.05. '-', variable not included in the model; NS, not significant (P>0.05) terms were dropped from the final model.

SUPPLEMENTARY DATA

**Supplementary Table 2.** Fixed effects for multilevel models of change over time of log<sub>2</sub>(adiponectin) concentrations before diabetes diagnosis or end of follow-up.

|                              | Model 1        | Model 2        | Model 3        | Model 4        |
|------------------------------|----------------|----------------|----------------|----------------|
| Incident diabetes            | -0.23(0.05)*   | -              | -              | -              |
| Early-onset diabetes         | -              | -0.40(0.12)†   | -0.30(0.11)‡   | -0.24(0.11)§   |
| Late-onset diabetes          | -              | -0.27(0.05)*   | -0.23(0.05)*   | -0.79(0.05)*   |
| Female                       | 0.77(0.03)*    | -              | 0.77(0.03)*    | 0.77(0.03)*    |
| Diabetes x Female            | -0.17(0.09)§   | -              | -0.17(0.09)§   | -0.19(0.09)§   |
| Time (per year)              | -0.005(0.001)* | -0.012(0.003)* | -0.005(0.001)* | -0.004(0.001)  |
| Female x Time                | NS             | -              | NS             | NS             |
| Diabetes x Time              | NS             | NS             | NS             | NS             |
| Early-onset diabetes x Time  | -              | -0.026(0.011)§ | -0.023(0.011)§ | NS             |
| Diabetes x Female x Time     | -0.016(0.006)‡ | -              | -0.016(0.005)† | 0.015(0.005)‡  |
| Fasting insulin (per μIU/ml) |                |                |                | -0.004(0.001)* |

Data are regression coefficients (SE). All models were adjusted for age at the end of follow-up and ethnicity (white/non-white). Model 1 is also adjusted for sex, model 2 for early-onset diabetes (<52 years of age at diabetes diagnosis), model 3 for both sex and early-onset diabetes, model 4 is model 3 further adjusted for fasting insulin level. Trajectories in 335 incident diabetes cases and 2475 controls. Models with the lowest information criteria are shown. \* P<0.0001, † P<0.001, ‡ P<0.01, § P<0.05. NA, not applicable (variable not included in the model); NS, not significant (P>0.05) terms were dropped from the final model.
